# Supplementary material for: Theoretical insights into non-oxidative propane dehydrogenation over Fe3C
Source: Royal Society of Chemistry journal article supplement (doi:10.1039/d0cp04669h), 2020-12-18
Supplement: d0cp04669h1.pdf [file d0cp04669h1.pdf]

## Supporting Information

### Theoretical Insights into Non-Oxidative Propane Dehydrogenation over Fe<sub>3</sub>C

Peng Wang<sup>a</sup> and Thomas P. Senftle<sup>a,\*</sup>

<sup>a</sup> Department of Chemical and Biomolecular Engineering, Rice University, Houston, TX 77005

\* tsenftle@rice.edu

*Data availability:* All final structures and scripts used to generate the plots are supplied in an online repository at <https://github.com/tsenftle/PDH-Fe3C>.

#### 1 Computational details

The k-points mesh and number of frozen atoms and total atoms in different models are summarized in Table S1.

**Table S1.** K-points and frozen atoms in different structures

| Structure                         | k-points mesh | frozen/total (Fe or Pt) | Frozen/total (C) |
|-----------------------------------|---------------|-------------------------|------------------|
| Fe, bulk                          | 8×8×8         | -                       | -                |
| Fe <sub>3</sub> C, bulk           | 4×4×4         | -                       | -                |
| Pt, bulk                          | 9×9×9         | -                       | -                |
| Fe <sub>3</sub> C(001)            | 3×3×1         | -                       | -                |
| Fe <sub>3</sub> C(010)            | 3×3×1         | -                       | -                |
| Fe <sub>3</sub> C(011)            | 3×3×1         | -                       | -                |
| Fe(110)-(2×2)                     | 4×3×1         | 16/40                   | -                |
| Fe(110)-(4×3)                     | 2×2×1         | 24/72                   | -                |
| Pt(111)-(2×2)                     | 3×4×1         | 16/48                   | -                |
| Fe <sub>3</sub> C(010)-CR-(2×2)   | 1×1×1         | 16/56                   | 8/24             |
| Fe <sub>3</sub> C(001)-ST-1-(2×1) | 2×2×1         | 12/48                   | 4/16             |
| Fe <sub>3</sub> C(001)-CR-(2×1)   | 2×2×1         | 12/48                   | 4/16             |
| Fe <sub>3</sub> C(011)-ST-1-(2×1) | 2×3×1         | 12/48                   | 4/16             |
| Fe <sub>3</sub> C(011)-CR-3-(2×1) | 2×3×1         | 16/44                   | 4/16             |

The adsorption of  $C_3H_x$  ( $x = 4, 5, 6, 7, 8$ ) on  $Fe_3C$  surfaces was systematically evaluated on multiple adsorption sites for each surface. These sites are summarized in Table S2, which specifies the surface Fe atoms bonded to the hydrocarbon. The number in parenthesis is the formation energy of the intermediate referenced to  $C_3H_8$  and  $H_2$ .

**Table S2.** Tested adsorption sites of each surface

| Surface            | Geometry                                                                            | Tested adsorption site (number of Fe atoms adsorbed with intermediates in relaxed structures) |                                                                     |                                                                                                               |                                                                      |
|--------------------|-------------------------------------------------------------------------------------|-----------------------------------------------------------------------------------------------|---------------------------------------------------------------------|---------------------------------------------------------------------------------------------------------------|----------------------------------------------------------------------|
|                    |                                                                                     | $C_3H_4^*$                                                                                    | $C_3H_5^*$                                                          | $C_3H_6^*$                                                                                                    | $C_3H_7^*$                                                           |
| Fe(110)            | 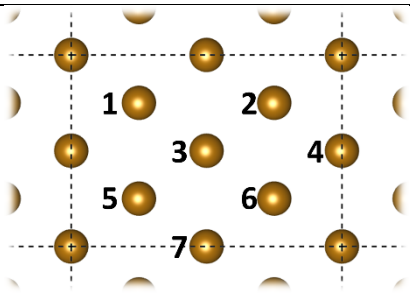   | <b>2-3-4-6</b><br>[0.208]                                                                     | <b>2-3-4-6</b><br>[0.435]                                           | 2-3-6<br>[0.129],<br><b>3-6-4</b><br>[0.099]                                                                  | 3-6-7<br>[-0.076],<br><b>2-3-6</b><br>[-0.211],<br>2-4-6<br>[-0.123] |
| $Fe_3C(001)$ -ST-1 |   | 1-2-4-5-6<br>[0.927],<br><b>1-4-5-7</b><br>[0.602]                                            | 4-5-7-6<br>[0.772],<br><b>1-4-7</b><br>[0.550],<br>4-5-7<br>[0.630] | 4-5-7-6<br>[0.414],<br><b>1-4-7</b><br>[-0.269],<br>1-4 [-0.080]                                              | <b>1-4</b><br>[-0.364],<br>4-7 [-0.25]                               |
| $Fe_3C(011)$ -ST-1 |  | 1-2 [1.855],<br><b>5-2-3-4</b><br>[1.781]                                                     | 1-2 [1.490],<br><b>5-2-3-4</b><br>[0.997]                           | 1-2 [0.136],<br><b>5-2-3-4</b><br>[0.072], 2-3-4 [0.265],<br>1-2-7-8 [0.604], 1-2-7 [0.488],<br>6-1-2 [0.614] | 2 [0.296],<br><b>1-2</b> [-0.155]                                    |

|                             |                                                                                    |                                           |                                                     |                                  |                         |
|-----------------------------|------------------------------------------------------------------------------------|-------------------------------------------|-----------------------------------------------------|----------------------------------|-------------------------|
| Fe <sub>3</sub> C(010)-CR   | 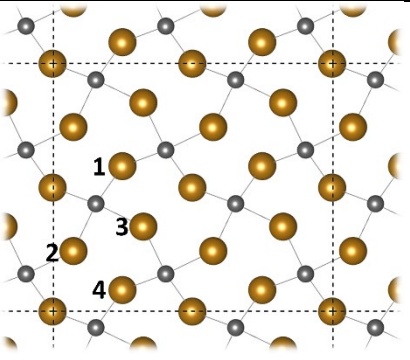  | 2-3 [2.379]                               | 2-3 [1.287]                                         | 2-3 [0.400]                      | 2 [0.309]               |
| Fe <sub>3</sub> C(001)-CR   |   | 3-4-5-6<br>[1.580],<br>1-3-4-5<br>[1.595] | 4 [1.981],<br>3-4-5<br>[1.523],<br>4-5-6<br>[1.261] | 4 [0.521],<br>5 [1.213]          | 4 [0.240]               |
| Fe <sub>3</sub> C(011)-CR-3 |  | 1-3-2<br>[1.380],<br>3-2 [1.950]          | 3-2 [1.027],<br>1-3-2<br>[0.892],<br>1-3 [1.241]    | 1-3-2<br>[0.466],<br>3-2 [0.602] | 3 [0.159],<br>1 [0.090] |

\* The most stable site is bold

\*\* The formation energy referring to C<sub>3</sub>H<sub>8</sub> and H<sub>2</sub> are shown in square brackets in eV

The charges of either C atom or PO<sub>4</sub> group from Bader charge analysis are summarized in Table S3 and Table S4, where  $e$  is the positive elementary charge.

**Table S3. Bader charge of C atom on Fe(110) surface**

| Charge of carbon ( $e$ ) | Pristine      | With Phosphate |
|--------------------------|---------------|----------------|
| 1 carbon                 | -1.30         | -1.21          |
| 2 carbon                 | -1.32 / -1.32 | -1.17 / -0.96  |

**Table S4.** Bader charge of PO<sub>4</sub> group on Fe(110) surface

| Charge of PO <sub>4</sub> group ( <i>e</i> ) | Phosphate |
|----------------------------------------------|-----------|
| No carbon                                    | -2.00     |
| 1 carbon                                     | -1.97     |
| 2 carbon                                     | -1.93     |

The comparison of the formation energy of 1-propyl and 2-propyl referenced to C<sub>3</sub>H<sub>8</sub> and H<sub>2</sub> on each surface is reported in Table S5.

**Table S5.** Comparison of formation energy of 1-propyl and 2-propyl from C<sub>3</sub>H<sub>8</sub> and H<sub>2</sub>

| Surface  | 1-propyl /eV | 2-propyl /eV | difference /eV |
|----------|--------------|--------------|----------------|
| 001-CR   | 0.24         | 0.34         | -0.10          |
| 001-ST-1 | -0.36        | -0.15        | -0.22          |
| 010-CR   | 0.31         | 0.30         | 0.00           |
| 011-CR-3 | 0.16         | 0.09         | 0.07           |
| 011-ST-1 | -0.16        | 0.07         | -0.22          |
| Fe(110)  | -0.19        | 0.14         | -0.33          |

## 2 Additional figures

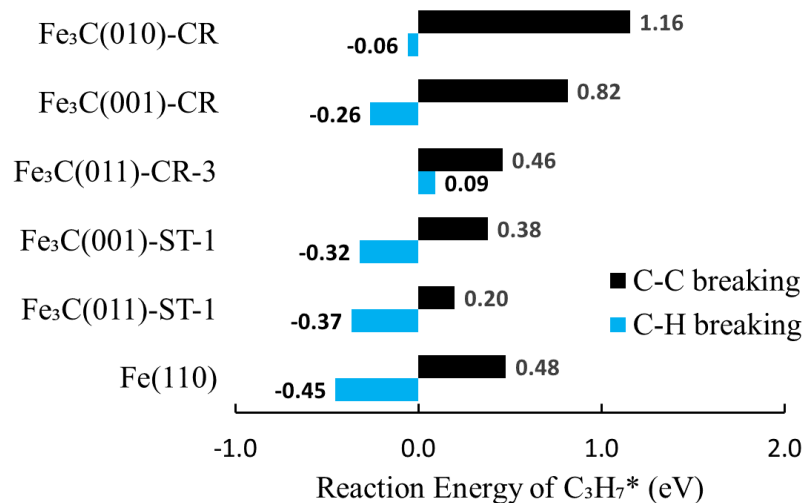

**Figure S1.** Comparison of the reaction energy for breaking the C-H bond versus the C-C bond of C<sub>3</sub>H<sub>7</sub>\* on each surface.

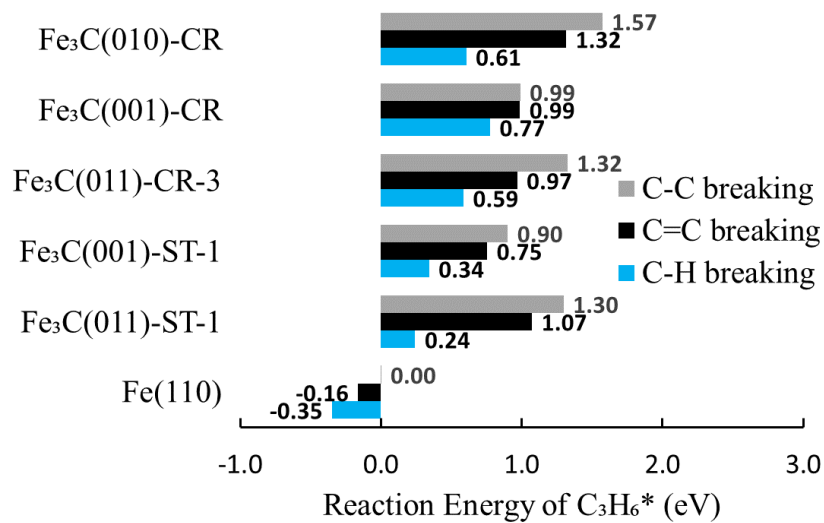

**Figure S2.** Comparison of the reaction energy for breaking the C-H bond, the C=C bond, and the C-C bond of C<sub>3</sub>H<sub>6</sub>\* on each surface.

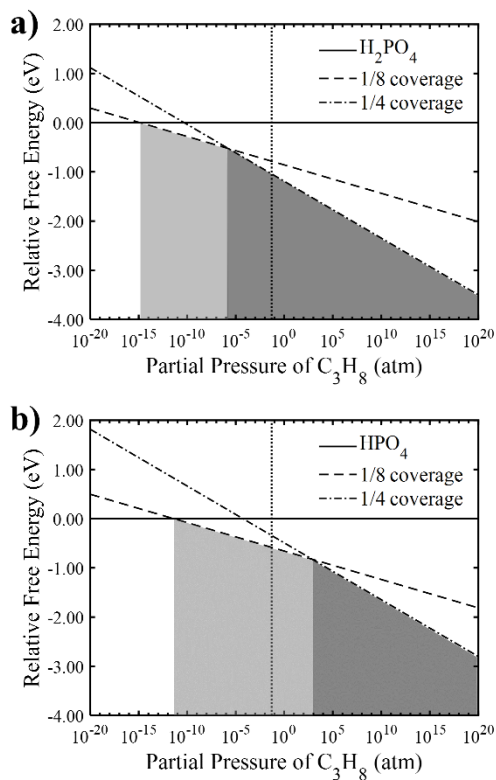

**Figure S3.** Phase diagrams of carbon coverage on a) Fe(110) with  $\text{H}_2\text{PO}_4$  adsorbed and b) Fe(110) with  $\text{HPO}_4$  adsorbed. The solid line is the surface without carbon and is taken as the reference. The dashed line is the surface with one carbon atom per  $(2 \times 2)$  cell. The dash-dotted line is the surface with two carbon atoms per  $(2 \times 2)$  cell. The dotted vertical line is the reaction condition, which is at 873.15 K, 0.01 atm  $\text{H}_2$ , and 0.05 atm  $\text{C}_3\text{H}_8$ . The light gray area represents the stable region of 1/8 coverage of carbon and the dark gray area is for 1/4 coverage of carbon.

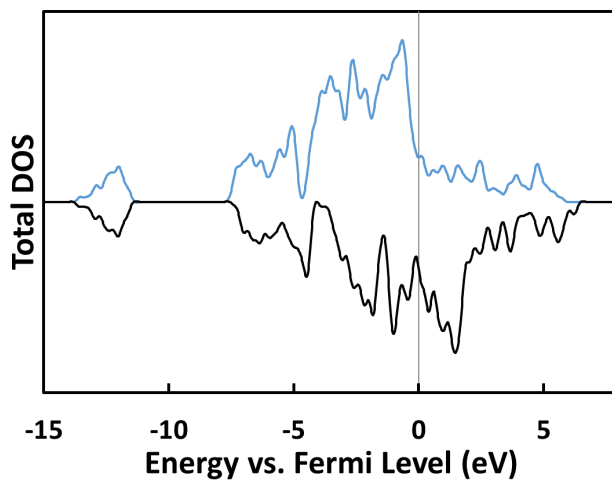

**Figure S4.** Density of states (DOS) of bulk  $\text{Fe}_3\text{C}$ . The blue and black line represent two different spin states. The vertical line is the Fermi level.

### 3 Detailed geometries

The detailed adsorption geometries of the most stable configuration along with the transition states on the surfaces of Fe, Fe<sub>3</sub>C, and Pt are shown with Figure S5-S11.

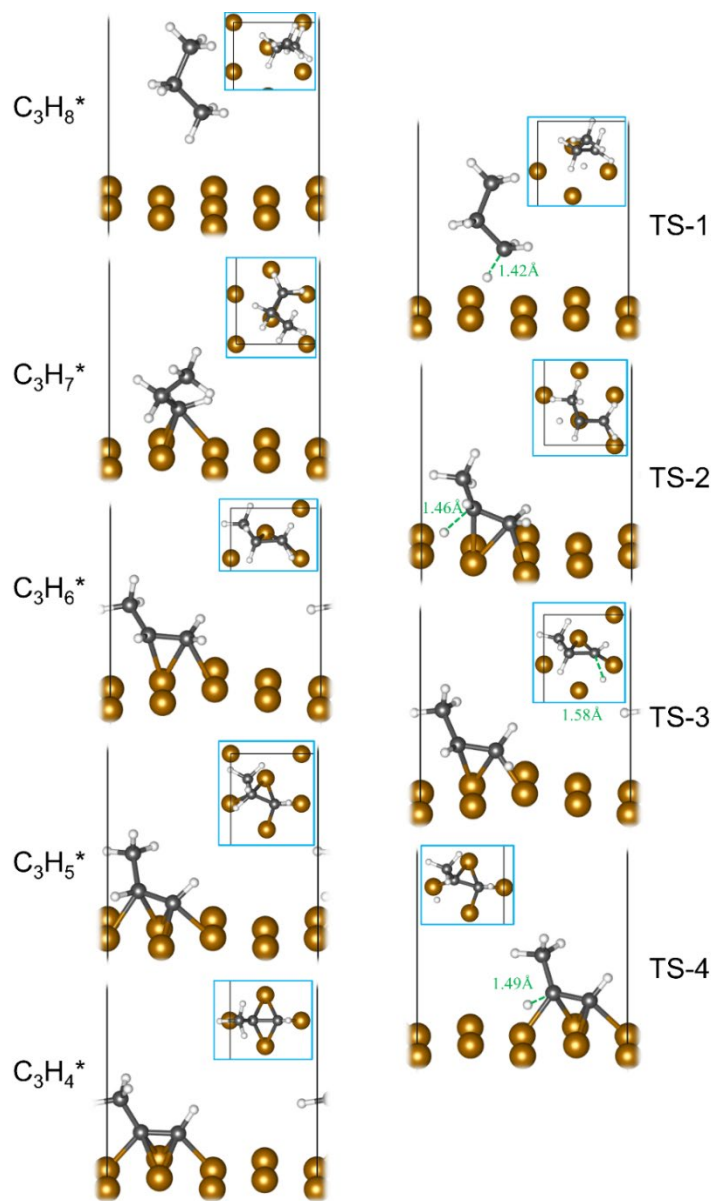

**Figure S5.** Adsorption configurations and transition state structures on Fe(110). The top views are shown as insets on top of each side view. The unit cell is shown with black line. Brown: Fe; Gray: C; White: H. The breaking bonds in transition states are labeled with green dashed lines with their bond lengths.

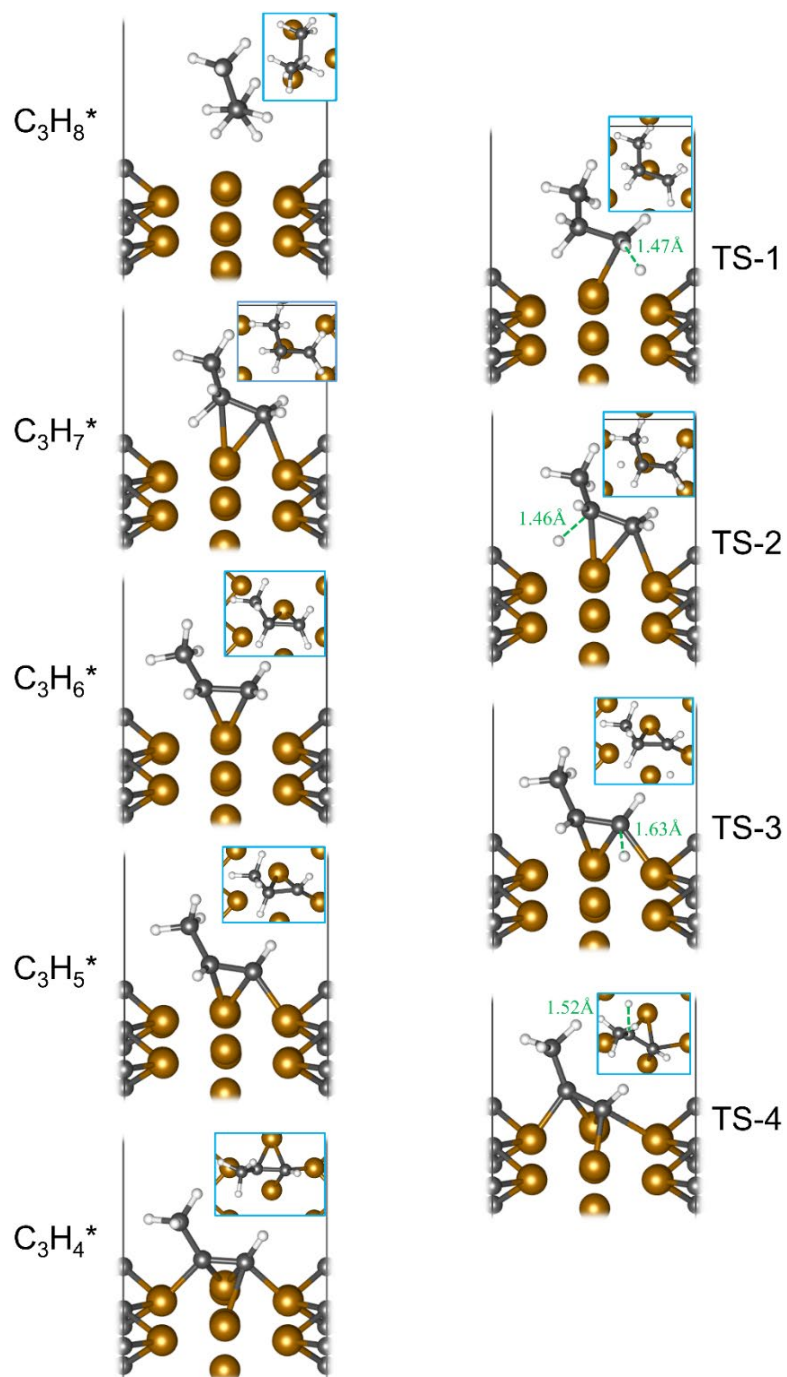

**Figure S6.** Adsorption configurations and transition state structures on  $Fe_3C(001)$ -ST-1.



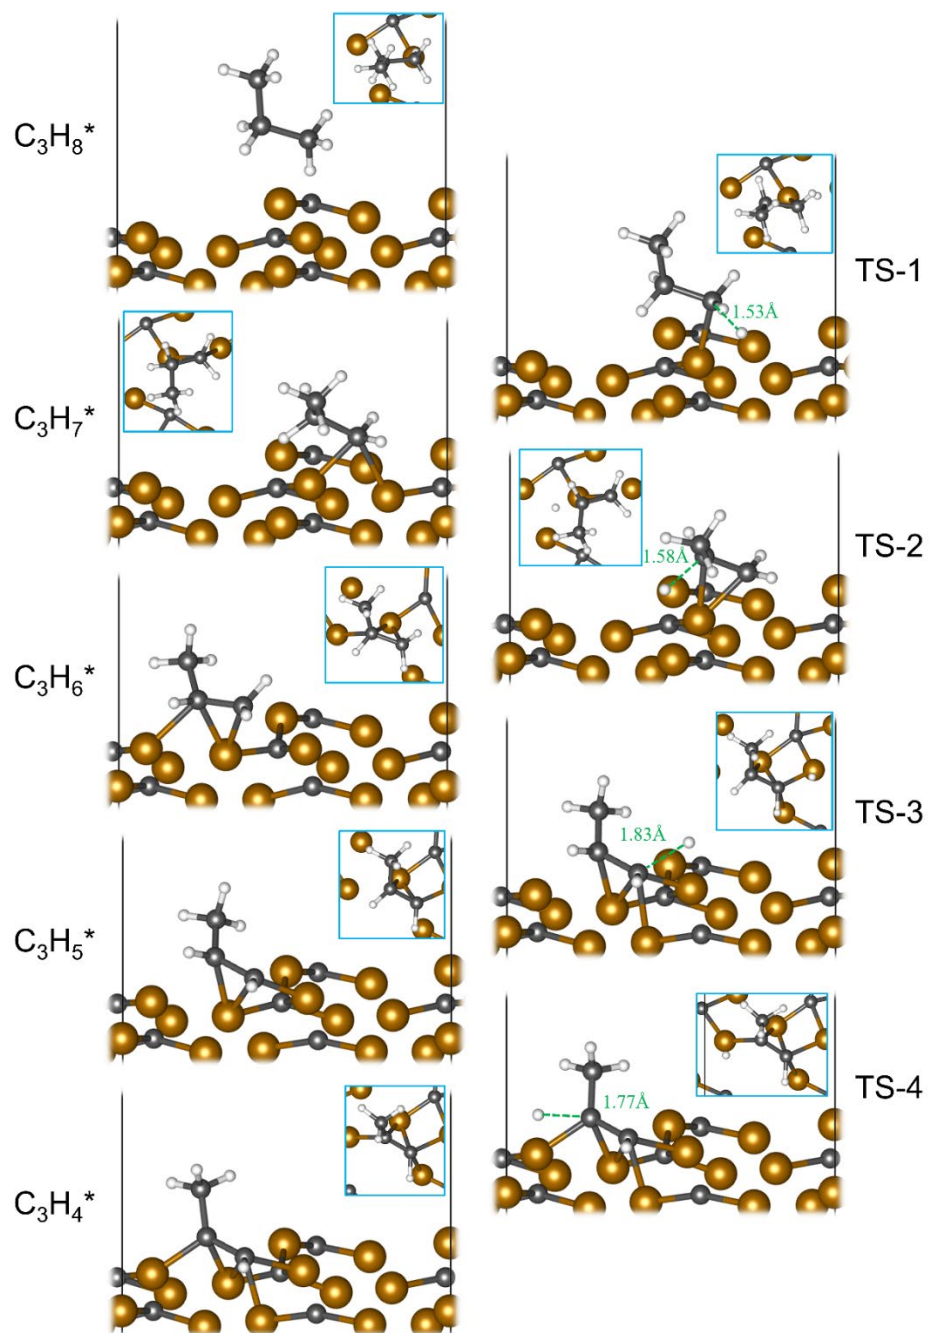

**Figure S7.** Adsorption configurations and transition state structures on  $Fe_3C(011)$ -ST-1.

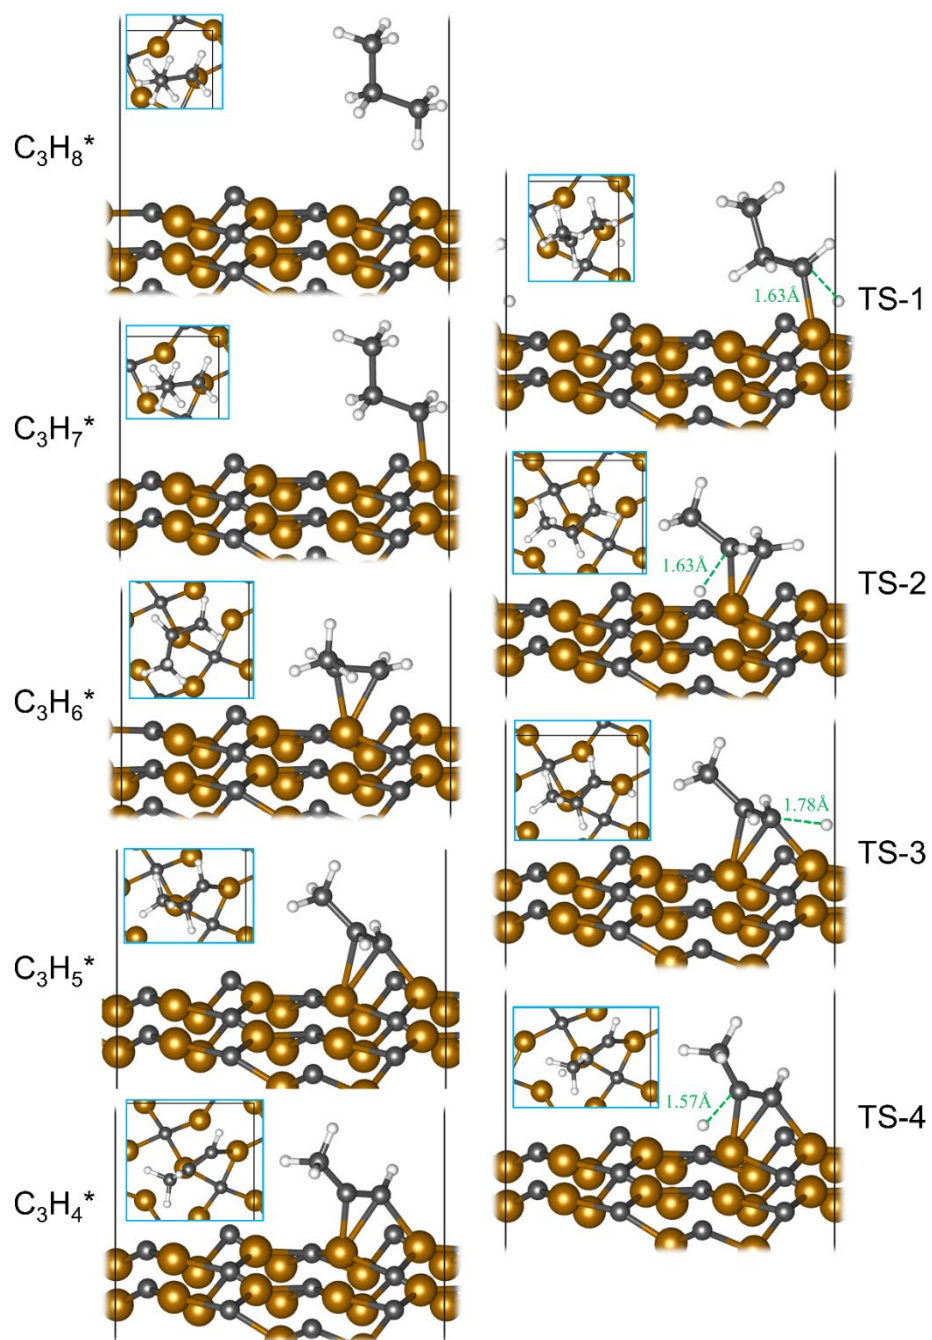

**Figure S8.** Adsorption configurations and transition state structures on  $Fe_3C(010)$ -CR.

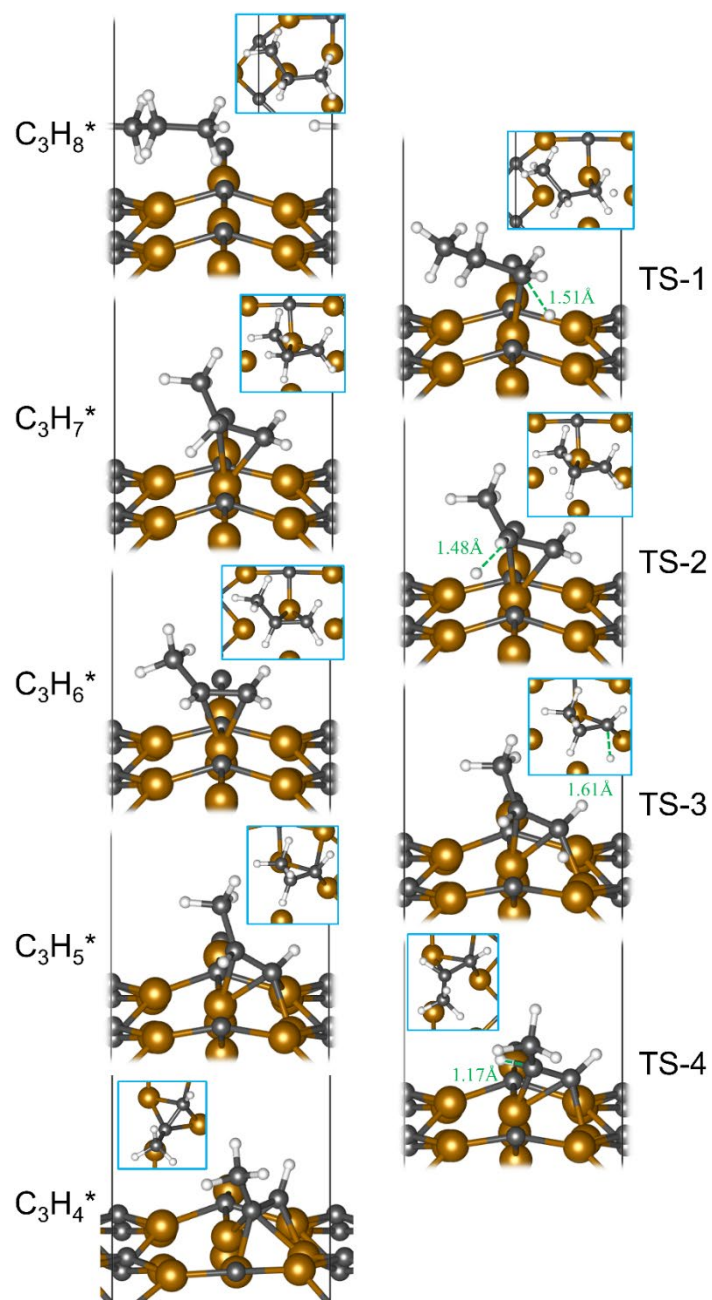

**Figure S9.** Adsorption configurations and transition state structures on  $Fe_3C(001)$ -CR.

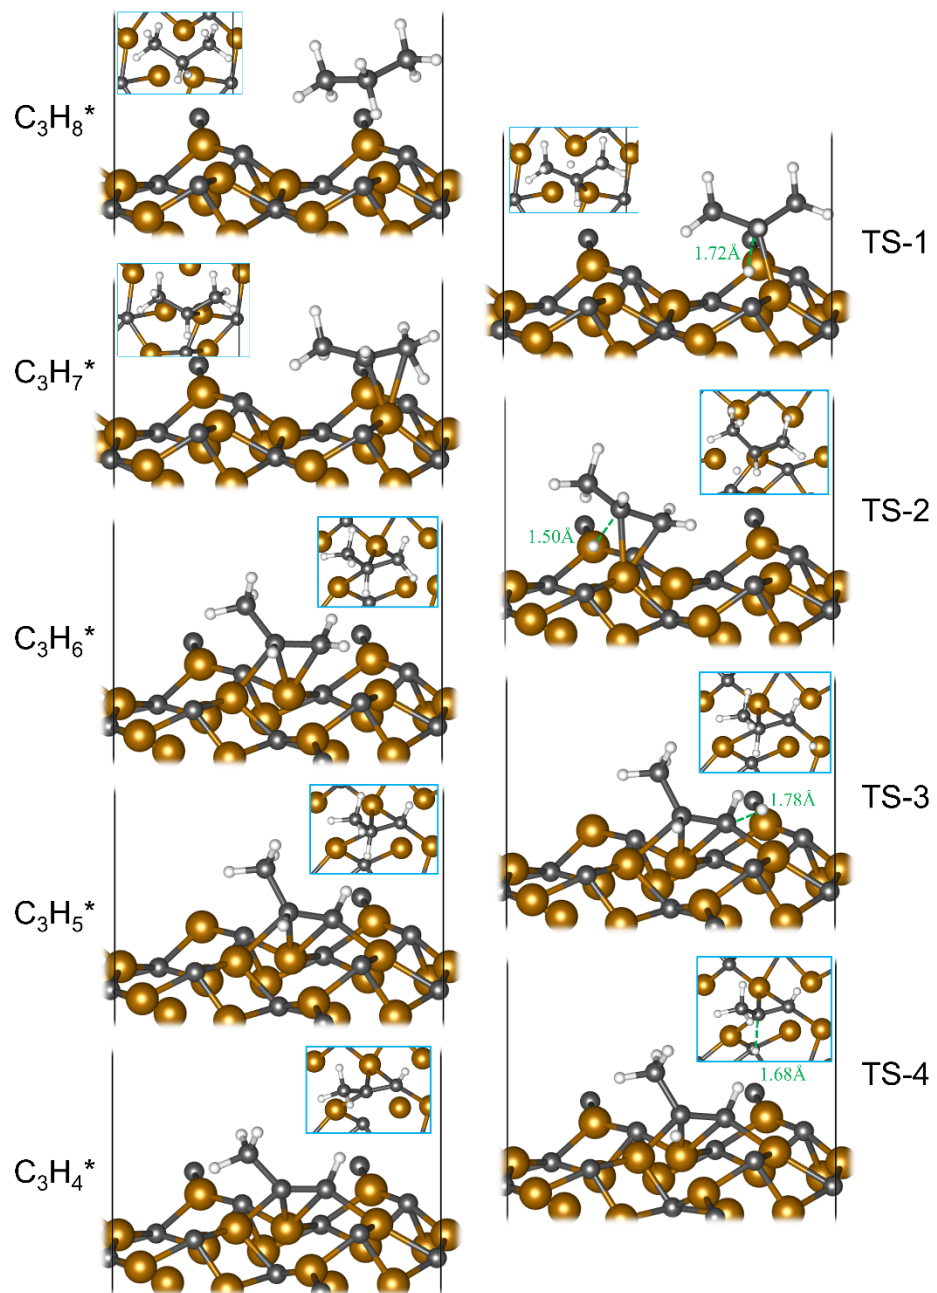

**Figure S10.** Adsorption configurations and transition state structures on  $Fe_3C(011)$ -CR-3.

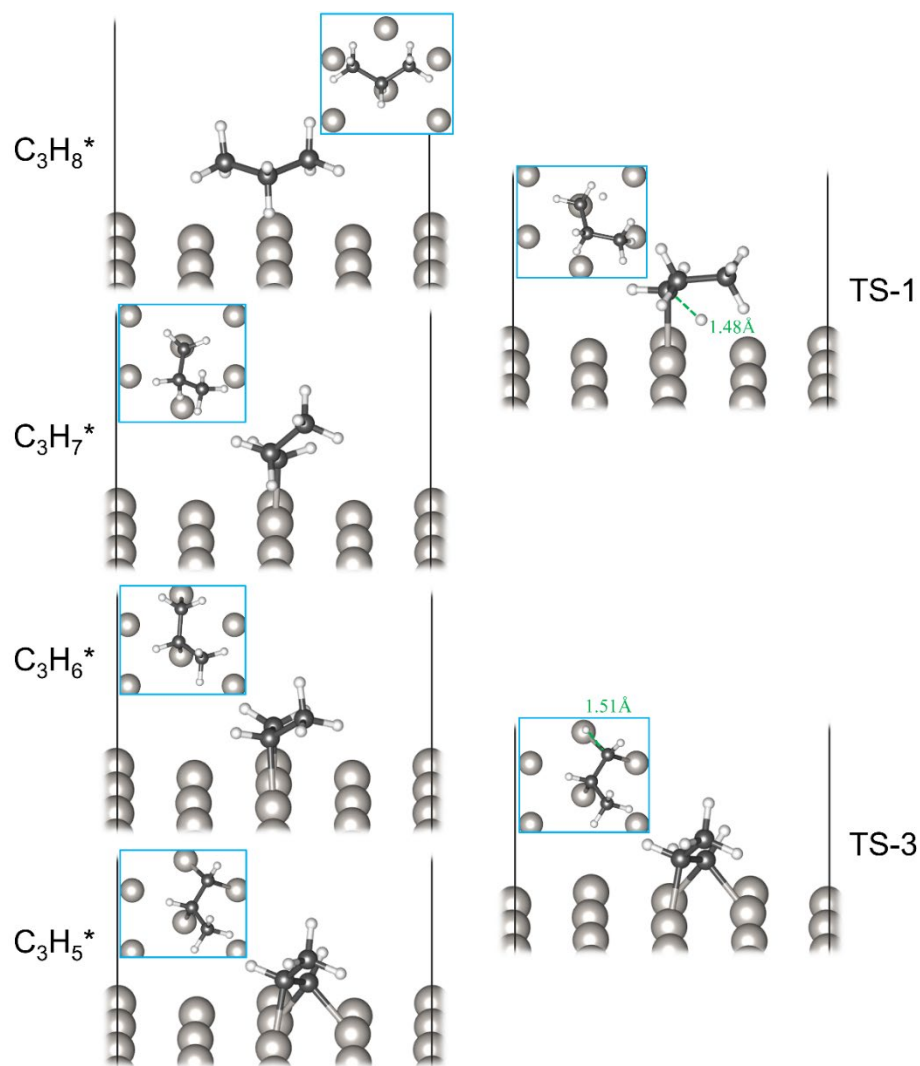

**Figure S11.** Adsorption configurations and transition state structures on Pt(111).

All final structures of stable adsorption and transition states in VASP format, and the script used to generate the plot in Figure 2 are supplied online at <https://github.com/tsenfle/PDH-Fe3C>.

## 4 Data in figures

The data needed to generate the plot in Figure 2 are shown in Table S6. Through the equations discussed in the main text, only the number of atoms and the total energies of the slabs is needed to determine their relative stability. The total DFT energy of Fe<sub>3</sub>C per formula unit is -34.824 eV. The free energies of propane and hydrogen at 873.15 K and 1 atm were -57.010 eV and -7.660 eV, respectively.

**Table S6.** The slab models and corresponding energies used in Figure 2

| Terminations | Number of Fe | Number of C | E (eV)   | Area (Å <sup>2</sup> ) |
|--------------|--------------|-------------|----------|------------------------|
| (011)-ST-1   | 48           | 16          | -543.072 | 40.009                 |
| (011)-CR-1   | 44           | 16          | -506.633 | 40.009                 |
| (011)-IR-1   | 44           | 12          | -469.516 | 40.009                 |
| (011)-IR-2   | 40           | 12          | -436.389 | 40.009                 |
| (011)-ST-2   | 36           | 12          | -402.318 | 40.009                 |
| (011)-CR-2   | 32           | 12          | -367.605 | 40.009                 |
| (011)-CR-3   | 28           | 12          | -333.903 | 40.009                 |
| (011)-IR-3   | 28           | 8           | -298.340 | 40.009                 |
| (001)-CR     | 42           | 16          | -493.609 | 33.240                 |
| (001)-ST-1   | 42           | 14          | -475.885 | 33.240                 |
| (001)-IR     | 42           | 12          | -456.102 | 33.240                 |
| (001)-ST-2   | 36           | 12          | -403.946 | 33.240                 |
| (010)-ST     | 48           | 16          | -548.679 | 22.267                 |
| (010)-CR     | 44           | 16          | -516.233 | 22.267                 |
| (010)-IR     | 40           | 12          | -442.862 | 22.267                 |

All the energies of adsorption configurations and transition states used to generate Figure 7 and Figure 8 are summarized in Table S7.

**Table S7.** DFT and Gibbs free energies of intermediates adsorption and transition states

| surface                     | Transition states / Adsorbed species                                | DFT energy E (eV) | Gibbs free energy G (eV) | Imaginary Frequency (cm <sup>-1</sup> ) |
|-----------------------------|---------------------------------------------------------------------|-------------------|--------------------------|-----------------------------------------|
| Fe                          | C <sub>3</sub> H <sub>8</sub> *                                     | -382.231          | -380.705                 | -                                       |
|                             | TS(C <sub>3</sub> H <sub>8</sub> *-C <sub>3</sub> H <sub>7</sub> *) | -381.621          | -380.339                 | 872.987                                 |
|                             | C <sub>3</sub> H <sub>7</sub> *                                     | -378.767          | -377.409                 | -                                       |
|                             | TS(C <sub>3</sub> H <sub>7</sub> *-C <sub>3</sub> H <sub>6</sub> *) | -378.689          | -377.380                 | 763.623                                 |
|                             | C <sub>3</sub> H <sub>6</sub> *                                     | -375.077          | -373.981                 | -                                       |
|                             | TS(C <sub>3</sub> H <sub>6</sub> *-C <sub>3</sub> H <sub>5</sub> *) | -374.624          | -373.641                 | 964.418                                 |
|                             | C <sub>3</sub> H <sub>5</sub> *                                     | -371.349          | -370.476                 | -                                       |
|                             | TS(C <sub>3</sub> H <sub>5</sub> *-C <sub>3</sub> H <sub>4</sub> *) | -371.254          | -370.335                 | 835.381                                 |
|                             | C <sub>3</sub> H <sub>4</sub> *                                     | -368.190          | -367.478                 | -                                       |
|                             | H*                                                                  | -329.053          | -329.029                 | -                                       |
|                             | Clean surface                                                       | -324.869          | -                        | -                                       |
| Fe <sub>3</sub> C(001)-ST-1 | C <sub>3</sub> H <sub>8</sub> *                                     | -590.313          | -588.789                 | -                                       |
|                             | TS(C <sub>3</sub> H <sub>8</sub> *-C <sub>3</sub> H <sub>7</sub> *) | -589.729          | -588.136                 | 862.987                                 |
|                             | C <sub>3</sub> H <sub>7</sub> *                                     | -586.728          | -585.398                 | -                                       |
|                             | TS(C <sub>3</sub> H <sub>7</sub> *-C <sub>3</sub> H <sub>6</sub> *) | -586.693          | -585.394                 | 712.511                                 |
|                             | C <sub>3</sub> H <sub>6</sub> *                                     | -583.249          | -582.082                 | -                                       |
|                             | TS(C <sub>3</sub> H <sub>6</sub> *-C <sub>3</sub> H <sub>5</sub> *) | -582.393          | -581.329                 | 733.047                                 |
|                             | C <sub>3</sub> H <sub>5</sub> *                                     | -579.046          | -578.154                 | -                                       |
|                             | TS(C <sub>3</sub> H <sub>5</sub> *-C <sub>3</sub> H <sub>4</sub> *) | -578.778          | -578.006                 | 741.219                                 |
|                             | C <sub>3</sub> H <sub>4</sub> *                                     | -575.612          | -574.892                 | -                                       |
|                             | H*                                                                  | -536.840          | -536.712                 | -                                       |
|                             | Clean surface                                                       | -532.654          | -                        | -                                       |
| Fe <sub>3</sub> C(011)-ST-1 | C <sub>3</sub> H <sub>8</sub> *                                     | -586.081          | -584.673                 | -                                       |
|                             | TS(C <sub>3</sub> H <sub>8</sub> *-C <sub>3</sub> H <sub>7</sub> *) | -585.531          | -584.104                 | 720.044                                 |
|                             | C <sub>3</sub> H <sub>7</sub> *                                     | -582.471          | -581.186                 | -                                       |
|                             | TS(C <sub>3</sub> H <sub>7</sub> *-C <sub>3</sub> H <sub>6</sub> *) | -582.243          | -580.936                 | 842.665                                 |

|                             |                                                                     |          |          |         |
|-----------------------------|---------------------------------------------------------------------|----------|----------|---------|
|                             | C <sub>3</sub> H <sub>6</sub> *                                     | -578.861 | -577.679 | -       |
|                             | TS(C <sub>3</sub> H <sub>6</sub> *-C <sub>3</sub> H <sub>5</sub> *) | -577.913 | -576.879 | 650.353 |
|                             | C <sub>3</sub> H <sub>5</sub> *                                     | -574.552 | -573.611 | -       |
|                             | TS(C <sub>3</sub> H <sub>5</sub> *-C <sub>3</sub> H <sub>4</sub> *) | -573.616 | -572.810 | 650.600 |
|                             | C <sub>3</sub> H <sub>4</sub> *                                     | -570.385 | -569.762 | -       |
|                             | H*                                                                  | -532.643 | -532.543 | -       |
|                             | Clean surface                                                       | -528.606 | -        | -       |
| Fe <sub>3</sub> C(010)-CR   | C <sub>3</sub> H <sub>8</sub> *                                     | -725.917 | -724.397 | -       |
|                             | TS(C <sub>3</sub> H <sub>8</sub> *-C <sub>3</sub> H <sub>7</sub> *) | -725.162 | -723.728 | 837.558 |
|                             | C <sub>3</sub> H <sub>7</sub> *                                     | -721.928 | -720.546 | -       |
|                             | TS(C <sub>3</sub> H <sub>7</sub> *-C <sub>3</sub> H <sub>6</sub> *) | -721.833 | -720.485 | 699.207 |
|                             | C <sub>3</sub> H <sub>6</sub> *                                     | -718.454 | -717.320 | -       |
|                             | TS(C <sub>3</sub> H <sub>6</sub> *-C <sub>3</sub> H <sub>5</sub> *) | -717.663 | -716.636 | 650.996 |
|                             | C <sub>3</sub> H <sub>5</sub> *                                     | -714.184 | -713.251 | -       |
|                             | TS(C <sub>3</sub> H <sub>5</sub> *-C <sub>3</sub> H <sub>4</sub> *) | -713.060 | -712.327 | 654.533 |
|                             | C <sub>3</sub> H <sub>4</sub> *                                     | -709.709 | -709.183 | -       |
|                             | H*                                                                  | -672.098 | -671.999 | -       |
| Clean surface               | -668.528                                                            | -        | -        |         |
| Fe <sub>3</sub> C(001)-CR   | C <sub>3</sub> H <sub>8</sub> *                                     | -588.945 | -587.412 | -       |
|                             | TS(C <sub>3</sub> H <sub>8</sub> *-C <sub>3</sub> H <sub>7</sub> *) | -588.073 | -586.383 | 819.175 |
|                             | C <sub>3</sub> H <sub>7</sub> *                                     | -584.841 | -583.440 | -       |
|                             | TS(C <sub>3</sub> H <sub>7</sub> *-C <sub>3</sub> H <sub>6</sub> *) | -584.803 | -583.432 | 716.748 |
|                             | C <sub>3</sub> H <sub>6</sub> *                                     | -581.177 | -580.001 | -       |
|                             | TS(C <sub>3</sub> H <sub>6</sub> *-C <sub>3</sub> H <sub>5</sub> *) | -580.055 | -578.931 | 900.835 |
|                             | C <sub>3</sub> H <sub>5</sub> *                                     | -577.053 | -576.049 | -       |
|                             | TS(C <sub>3</sub> H <sub>5</sub> *-C <sub>3</sub> H <sub>4</sub> *) | -576.205 | -575.272 | 245.408 |
|                             | C <sub>3</sub> H <sub>4</sub> *                                     | -573.351 | -572.581 | -       |
|                             | H*                                                                  | -535.534 | -535.397 | -       |
| Clean surface               | -531.372                                                            | -        | -        |         |
| Fe <sub>3</sub> C(011)-CR-3 | C <sub>3</sub> H <sub>8</sub> *                                     | -549.371 | -547.833 | -       |
|                             | TS(C <sub>3</sub> H <sub>8</sub> *-C <sub>3</sub> H <sub>7</sub> *) | -548.601 | -546.958 | 659.618 |
|                             | C <sub>3</sub> H <sub>7</sub> *                                     | -545.112 | -543.810 | -       |



|         |                                                                     |          |          |          |
|---------|---------------------------------------------------------------------|----------|----------|----------|
|         | TS(C <sub>3</sub> H <sub>7</sub> *-C <sub>3</sub> H <sub>6</sub> *) | -544.954 | -543.607 | 1028.981 |
|         | C <sub>3</sub> H <sub>6</sub> *                                     | -541.354 | -540.147 | -        |
|         | TS(C <sub>3</sub> H <sub>6</sub> *-C <sub>3</sub> H <sub>5</sub> *) | -540.750 | -539.581 | 393.150  |
|         | C <sub>3</sub> H <sub>5</sub> *                                     | -537.544 | -536.528 | -        |
|         | TS(C <sub>3</sub> H <sub>5</sub> *-C <sub>3</sub> H <sub>4</sub> *) | -536.926 | -536.038 | 654.454  |
|         | C <sub>3</sub> H <sub>4</sub> *                                     | -533.673 | -532.886 | -        |
|         | H*                                                                  | -495.477 | -495.356 | -        |
|         | Clean surface                                                       | -491.493 | -        | -        |
| Pt(111) | C <sub>3</sub> H <sub>8</sub> *                                     | -354.147 | -352.427 | -        |
|         | TS(C <sub>3</sub> H <sub>8</sub> *-C <sub>3</sub> H <sub>7</sub> *) | -353.672 | -352.256 | 885.778  |
|         | C <sub>3</sub> H <sub>7</sub> *                                     | -350.419 | -349.141 | -        |
|         | C <sub>3</sub> H <sub>6</sub> *                                     | -347.096 | -345.809 | -        |
|         | TS(C <sub>3</sub> H <sub>6</sub> *-C <sub>3</sub> H <sub>5</sub> *) | -346.341 | -345.126 | 709.733  |
|         | C <sub>3</sub> H <sub>5</sub> *                                     | -343.162 | -342.078 | -        |
|         | H*                                                                  | -300.364 | -329.029 | -        |
|         | Clean surface                                                       | -296.412 | -        | -        |
